# Supplementary material
Source: PubMed Central journal article supplement (PMC3734952)
Supplement: NIHMS477147-supplement-Supplementary_file.pdf [file NIHMS477147-supplement-Supplementary_file.pdf]

Additional File 1: Comparing Odds ratios (OR) and 95% confidence intervals (CI) for some of the established breast cancer risk factors between women in this study and the entire CBCS

| Variable                        | CBCS<br>OR (95% CI) | This study<br>OR (95% CI) |
|---------------------------------|---------------------|---------------------------|
| Age                             | 1.05 (1.04-1.07)    | 1.02 (1.00-1.04)          |
| BMI                             | 0.98 (0.96-0.99)    | 0.99 (0.97-1.01)          |
| Race                            |                     |                           |
| White                           | 1.00                | 1.00                      |
| Non-white                       | 1.76 (1.44-2.14)    | 1.44 (1.06-1.94)          |
| Menopausal Status               |                     |                           |
| Premenopausal                   | 1.00                | 1.00                      |
| Postmenopausal                  | 0.77 (0.58-1.03)    | 1.36 (0.88-2.11)          |
| Family history of breast cancer | 1.78 (1.39-2.28)    | 1.32 (0.92-1.90)          |
| Age at menarche                 |                     |                           |
| <13                             | 1.00                | 1.00                      |
| ≥13                             | 0.87 (0.73-1.03)    | 0.68 (0.52-0.90)          |
| Parity (vs. nulliparous)        |                     |                           |
| Nulliparous                     | 1.00                | 1.00                      |
| Parous, <26                     | 0.84 (0.65-1.10)    | 0.94 (0.63-1.39)          |
| Parous, 26+                     | 0.97 (0.72-1.30)    | 0.86 (0.55-1.37)          |
| Hormone therapy                 |                     |                           |
| Never                           | 1.00                | 1.00                      |
| Current                         | 0.97 (0.76-1.24)    | 0.73 (0.51-1.05)          |
| Former                          | 0.95 (0.71-1.28)    | 0.60 (0.37-0.95)          |
